# Supplementary material
Source: publisher figshare collection journal article supplement (https://acs.figshare.com/ndownloader/files/4311718)
Supplement: Supplementary file 1 [file 4311718]

Electronic Supplementary Information for:

**Synthesis and characterization of fluorescent polymer-metal nanocomposites comprising of Poly(silylene-*co*-silyne)s and silver nanoparticles**

Ravi Shankar,\* Usharani Sahoo and Vandana Shahi

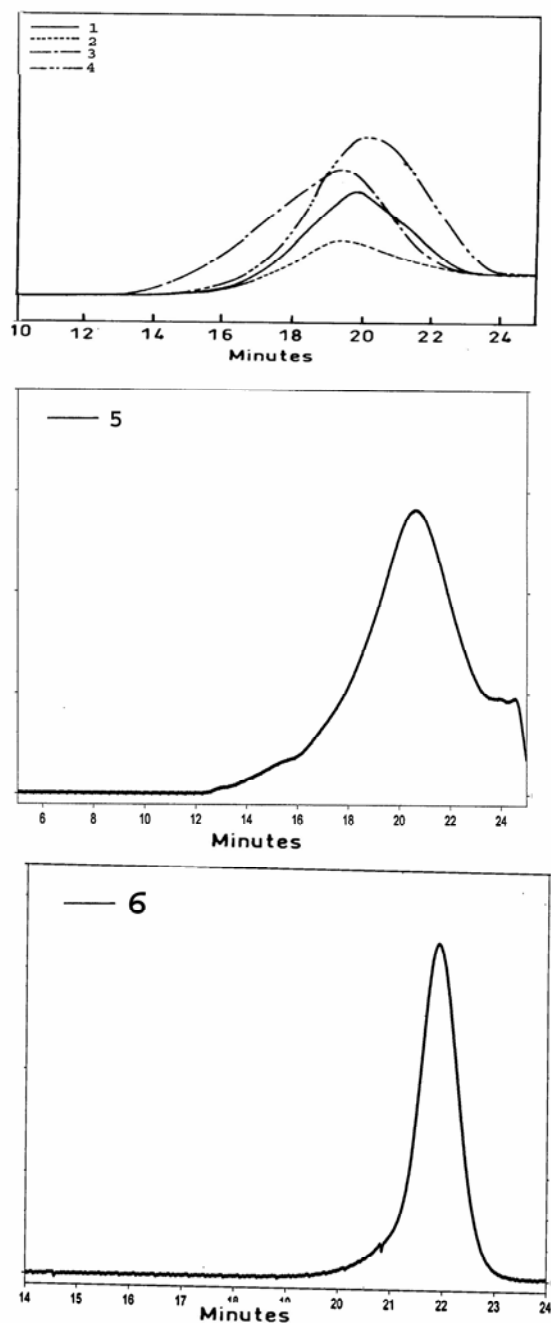

**Figure S1.** GPC profiles of branched polysilanes **1-6**

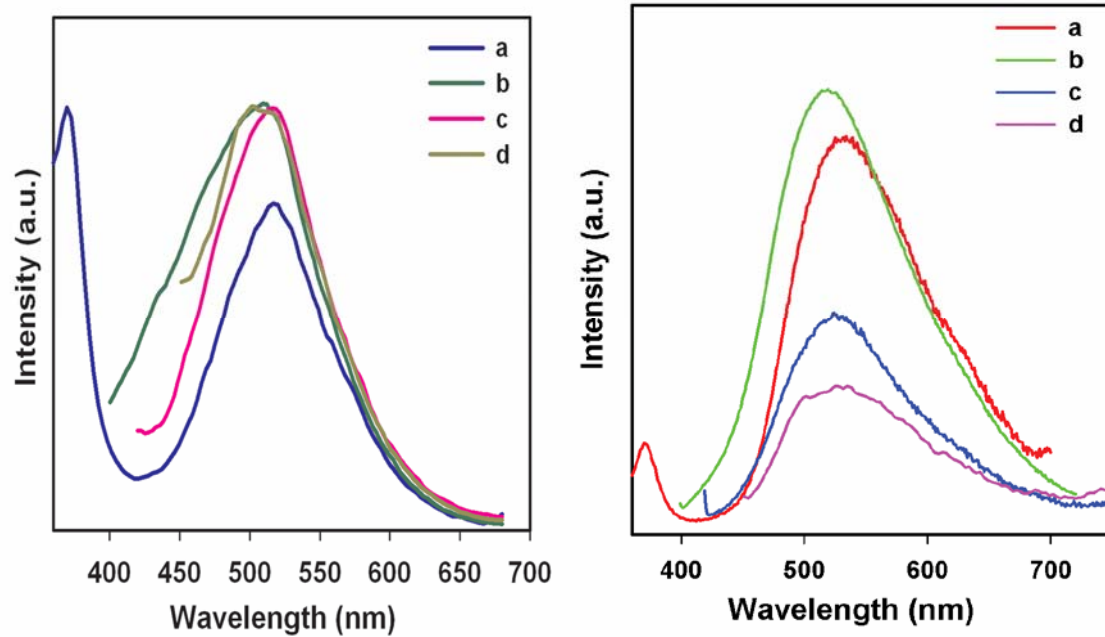

**Figure S2.** Emission spectra of nanocomposites **1a** and **4a** at different excitation wavelengths: a (350 nm), b (380 nm), c (400 nm), d (430 nm).

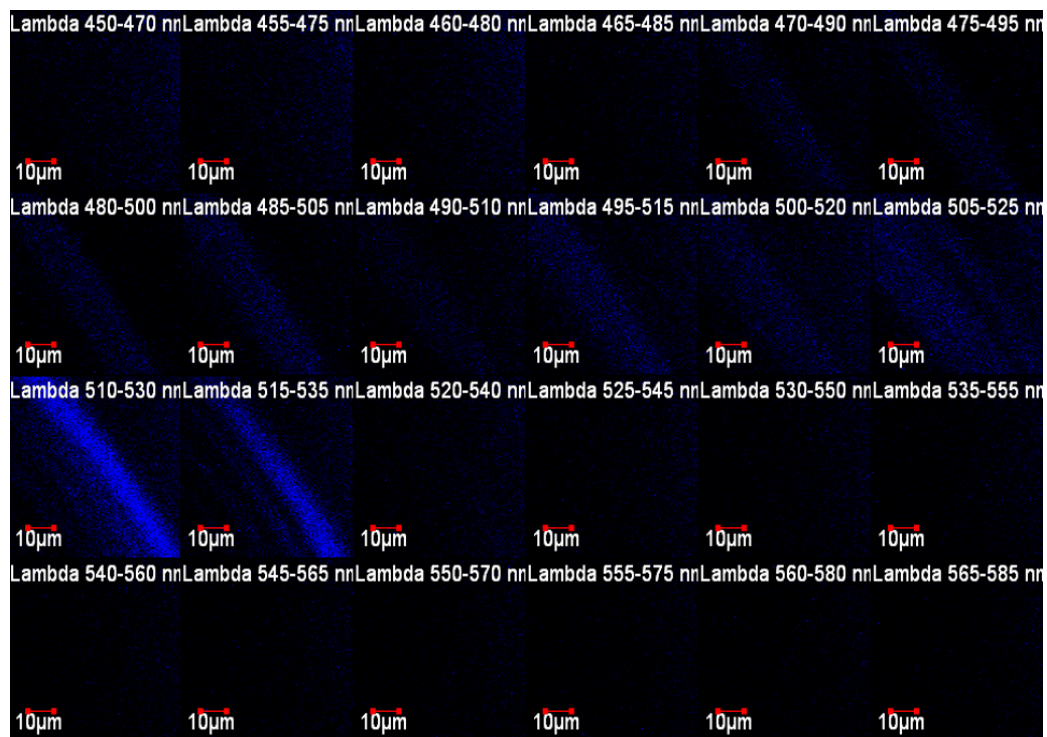

**Figure S3.** Confocal scanning microscopic images of polymer-Ag nanocomposite **1a** (The images in the wavelength range 450-585 nm were taken by inverted Olympus FV-1000 device using 400 nm laser for excitation)

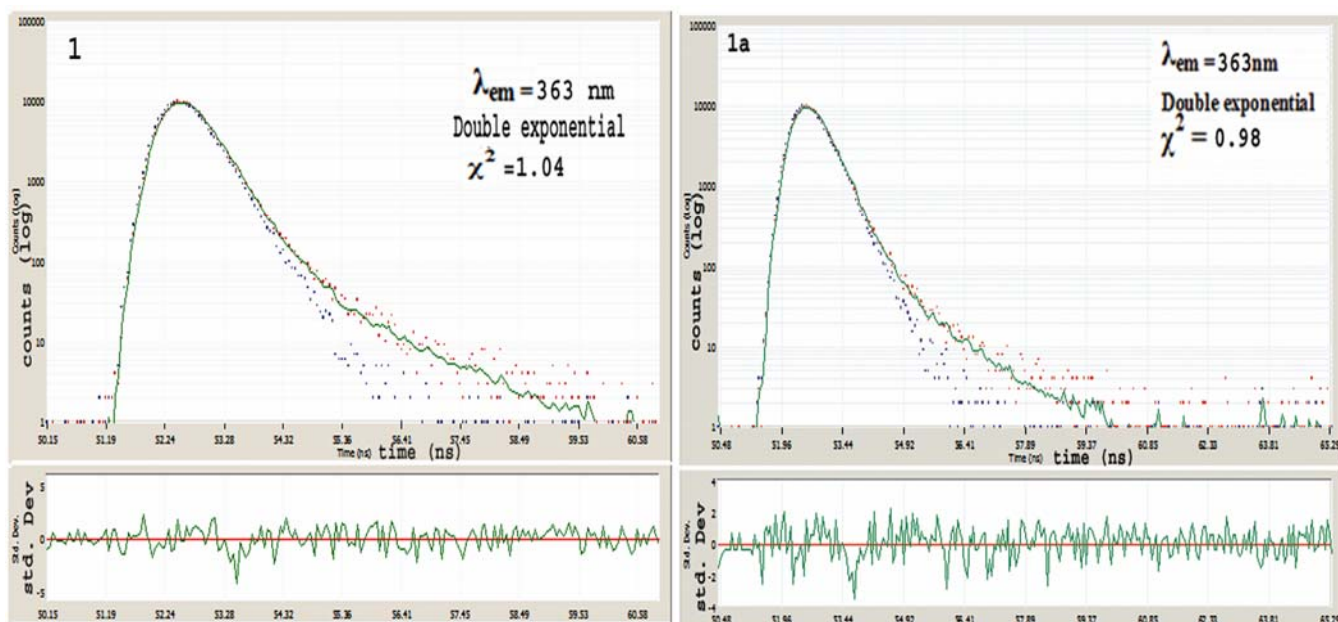

**Figure S4.** Fluorescence decay curve of polymer **1** and composite **1a** monitored at 363 nm. Excitation is carried out by using 340 nm lasers. The bottom curves (blue) denote the instrumental response function, the top panels (green) provide double-exponential fits to experimental data and the lower panels show weighted residuals for the corresponding fits.

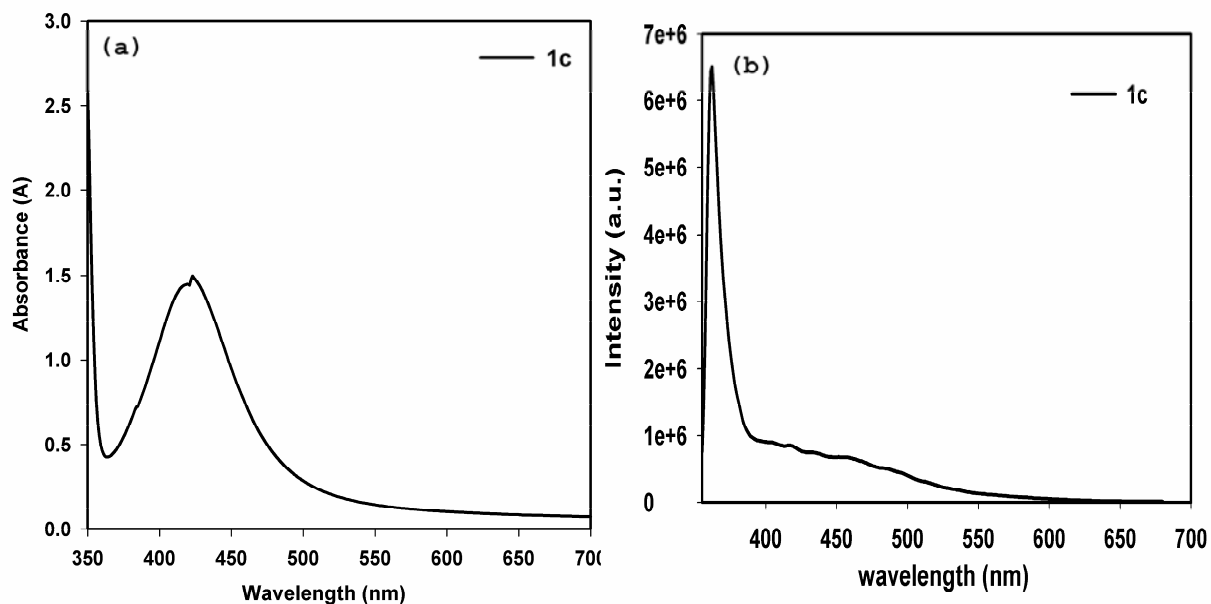

**Figure S5.** (a) UV-Vis and (b) PL emission spectra of composite **1c** (Toluene, RT)

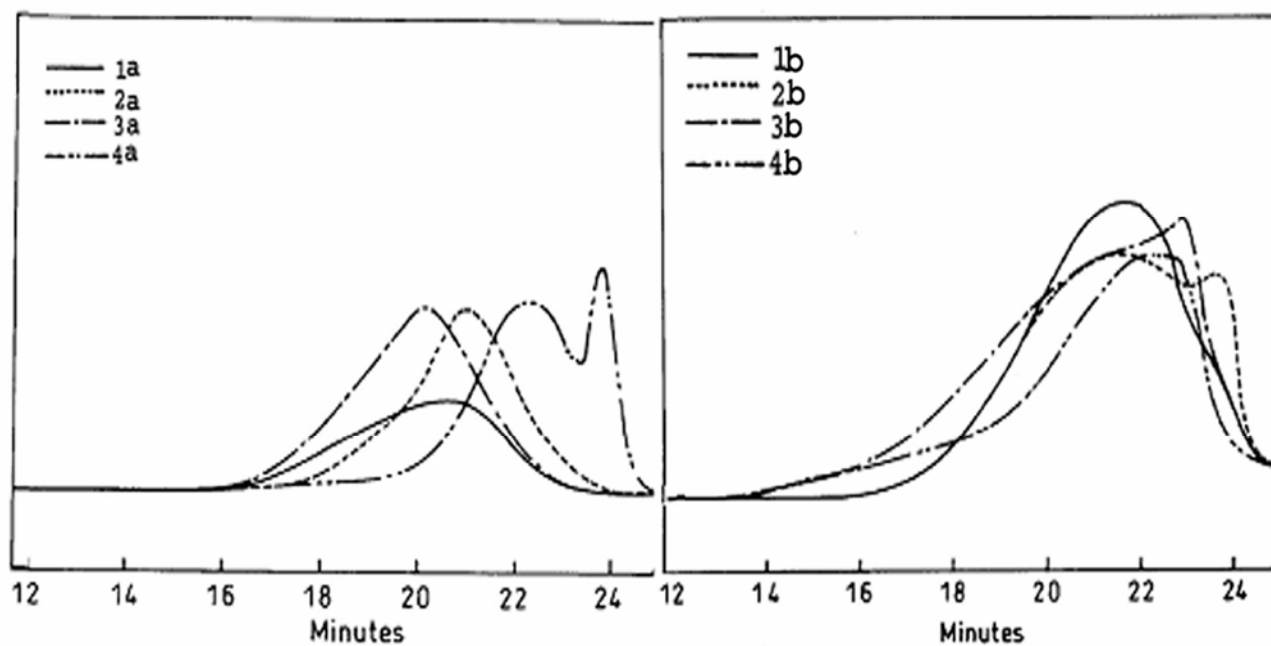

**Figure S6.** GPC profiles of oxidized polymers derived from **1a-4a** and **1b-4b**

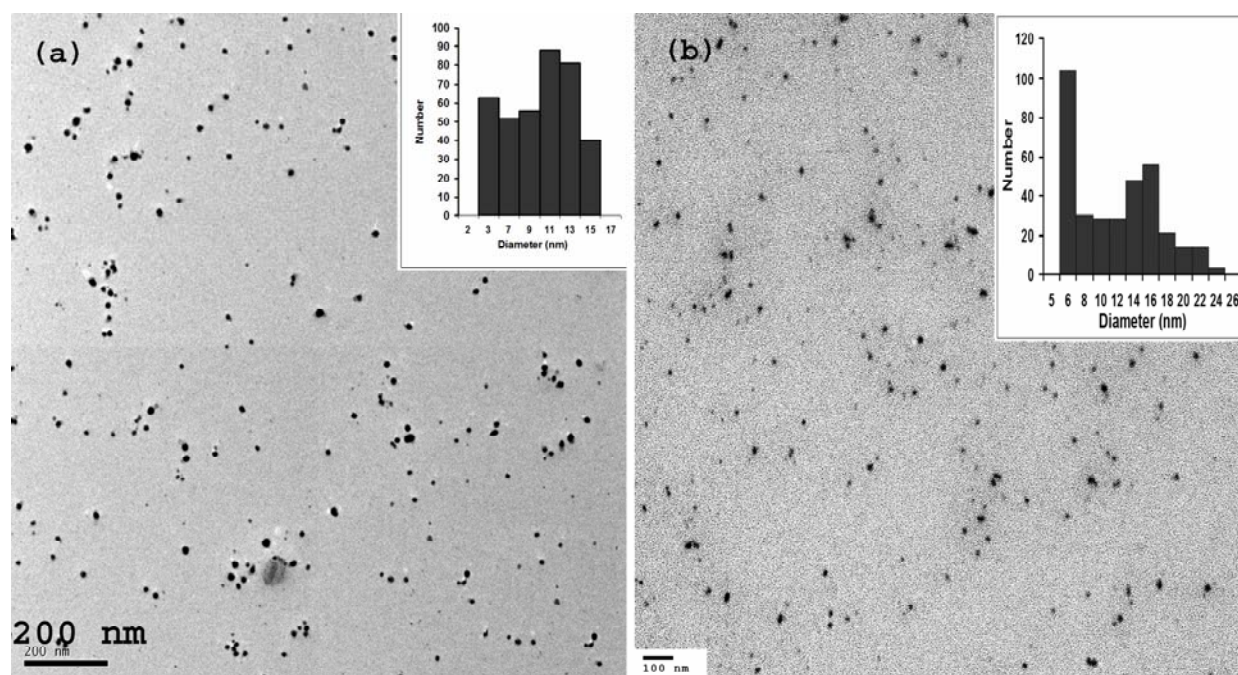

**Figure S7.** TEM images of silver nanoparticles in composites **5a** (a) and **6a** (b) derived from copolymer  $[(\text{PhMeSi})_{0.55}\text{-co-(Et}_3\text{SiCH}_2\text{CH}_2\text{Si)}_{0.45}]_n$  and polysilyne  $[\text{Et}_3\text{SiCH}_2\text{CH}_2\text{Si}]_n$  respectively.

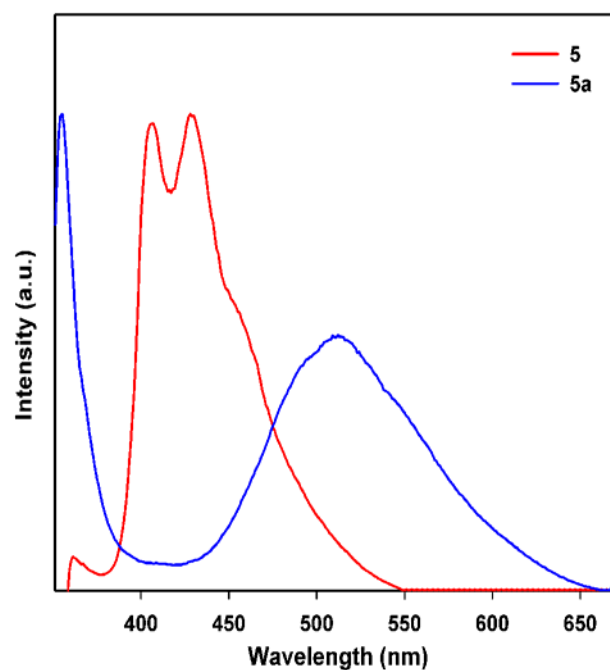

**Figure S8.** PL emission (Toluene, RT) spectrum of polymer **5** and composite **5a**

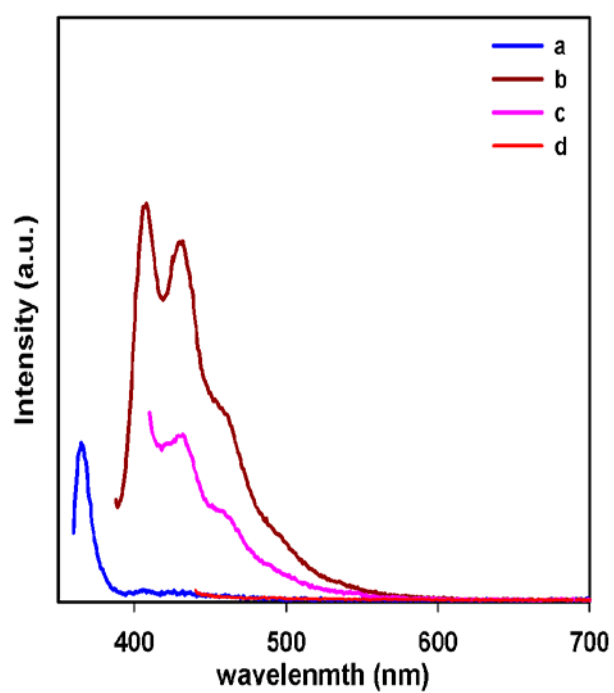

**Figure S9.** Emission spectra of silver nanocomposite derived from mixture of homopolymers,  $[\text{Ph}(\text{Me})\text{Si}]_n$  and  $[\text{Et}_3\text{SiCH}_2\text{CH}_2\text{Si}]_n$  at different excitation wavelengths; (a) 350; (b) 360; (c) 400 and (d) 430 nm.
